# Supplementary material for: Return to Work, Fatigue and Cancer Rehabilitation after Curative Radiotherapy and Radiochemotherapy for Pelvic Gynecologic Cancer
Source: Cancers (Basel). 2022 May 8;14(9):2330. doi: 10.3390/cancers14092330 (PMC9099439; doi:10.3390/cancers14092330)
Supplement: Supplementary file 1 [file cancers-14-02330-s001.zip › cancers-1671353-supplementary.pdf]

**Table S1.** Statistical results for Pearson Chi-squared ( $\chi^2$ ) test.

| Characteristics                                         | Group1               | Group2               | Total       | p-Value               |
|---------------------------------------------------------|----------------------|----------------------|-------------|-----------------------|
| FIGO stage (1/2 vs. 3/4) X <sup>2</sup>                 |                      |                      |             |                       |
| acute nausea                                            | 44 (43.1%)           | 58 (56.9%)           | 102 (24.1%) | <0.001                |
| no acute nausea                                         | 204 (63.4%)          | 118 (36.6%)          | 322 (75.9%) |                       |
| total                                                   | 1/2: N = 248 (58.5%) | 3/4: N = 176 (41.5%) | 424         |                       |
| acute gastrointestinal toxicity                         | 76 (46.1%)           | 89 (53.9%)           | 165 (38.9%) | <0.001 X <sup>2</sup> |
| no acute gastrointestinal toxicity                      | 172 (66.4%)          | 87 (33.6%)           | 259 (61.1%) |                       |
| total                                                   | 1/2: N = 248 (58.5%) | 3/4: N = 176 (41.5%) | 424         |                       |
| acute dermatitis/mucositis                              | 42 (54.5%)           | 35 (45.5%)           | 77 (18.2%)  | <0.001                |
| no acute dermatitis/mucositis                           | 206 (59.4%)          | 141 (40.6%)          | 347 (81.8%) |                       |
| total                                                   | 1/2: N = 248 (58.5%) | 3/4: N = 176 (41.5%) | 424         |                       |
| Chemotherapy (yes vs. no) X <sup>2</sup>                |                      |                      |             |                       |
| acute nausea                                            | 85 (83.3%)           | 17 (16.7%)           | 102 (24.1%) | <0.001                |
| no acute nausea                                         | 144 (44.7%)          | 178 (55.3%)          | 322 (75.9%) |                       |
| total                                                   | yes: N = 229 (54.0%) | no: N = 195 (46.0%)  | 424         |                       |
| acute gastrointestinal toxicity                         | 114 (69.1%)          | 51 (30.9%)           | 165 (38.9%) | <0.001                |
| no acute gastrointestinal toxicity                      | 115 (44.4%)          | 144 (55.6%)          | 259 (61.1%) |                       |
| total                                                   | yes: N = 229 (54.0%) | no: N = 195 (46.0%)  | 424         |                       |
| acute dermatitis/mucositis                              | 43 (55.8%)           | 34 (44.2%)           | 77 (18.2%)  | <0.001                |
| no acute dermatitis/mucositis                           | 186 (53.6%)          | 161 (46.4%)          | 347 (81.8%) |                       |
| total                                                   | yes: N = 229 (54.0%) | no: N = 195 (46.0%)  | 424         |                       |
| acute urinary toxicity                                  | 67 (60.9%)           | 43 (39.1%)           | 110 (25.9%) | 0.024                 |
| no acute urinary toxicity                               | 162 (51.6%)          | 152 (48.4%)          | 314 (74.1%) |                       |
| total                                                   | yes: N = 229 (54.0%) | no: N = 195 (46.0%)  | 424         |                       |
| acute fatigue                                           | 98 (63.6%)           | 56 (36.4%)           | 154 (36.3%) | 0.015                 |
| no acute fatigue                                        | 131 (48.5%)          | 139 (51.5%)          | 270 (63.7%) |                       |
| total                                                   | yes: N = 229 (54.0%) | no: N = 195 (46.0%)  | 424         |                       |
| Charlson Comorbidity Index * (≤5 vs. >5) X <sup>2</sup> |                      |                      |             |                       |
| acute nausea                                            | 18 (17.6%)           | 84 (82.4%)           | 102 (24.1%) | 0.001                 |
| no acute nausea                                         | 259 (80.4%)          | 63 (19.6%)           | 322 (75.9%) |                       |
| total                                                   | ≤5: 349 (82.3%)      | >5: 75 (17.7%)       | 424         |                       |
| acute fatigue                                           | 107 (69.5%)          | 47 (30.5%)           | 154 (36.3%) | 0.047                 |
| no acute fatigue                                        | 242 (89.6%)          | 28 (10.4%)           | 270 (63.7%) |                       |
| total                                                   | ≤5: 349 (82.3%)      | >5: 75 (17.7%)       | 424         |                       |
| weight loss during RT                                   | 61 (59.2%)           | 64 (62.1%)           | 103 (24.3%) | 0.005                 |
| no weight loss during RT                                | 288 (89.7%)          | 33 (10.3%)           | 321 (75.7%) |                       |
| total                                                   | ≤5: 349 (82.3%)      | >5: 75 (17.7%)       | 424         |                       |
| Age (<45 vs. ≥45 years) X <sup>2</sup>                  |                      |                      |             |                       |
| new depression                                          | 8 (50.0%)            | 8 (50.0%)            | 16 (3.8%)   | 0.001                 |
| no new depression                                       | 40 (9.8%)            | 368 (90.2%)          | 408 (96.2%) |                       |
| total                                                   | <45: N = 48 (11.3%)  | ≥45: N = 376 (88.7%) | 424         |                       |
| acute urinary toxicity                                  | 15 (13.6%)           | 95 (86.4%)           | 110 (25.9%) | 0.036                 |
| no acute urinary toxicity                               | 33 (10.5%)           | 281 (89.5%)          | 314 (74.1%) |                       |
| total                                                   | <45: N = 48 (11.3%)  | ≥45: N = 376 (88.7%) | 424         |                       |
| acute fatigue                                           | 15 (9.7%)            | 139 (90.3%)          | 154 (36.3%) | 0.025                 |
| no acute fatigue                                        | 33 (12.2%)           | 237 (87.8%)          | 270 (63.7%) |                       |
| total                                                   | <45: N = 48 (11.3%)  | ≥45: N = 376 (88.7%) | 424         |                       |
| Smokers (yes vs. no) X <sup>2</sup>                     |                      |                      |             |                       |
| acute urinary toxicity                                  | 21 (19.1%)           | 89 (80.9%)           | 110 (25.9%) | 0.029                 |

|                                                                         |                      |                     |             |         |
|-------------------------------------------------------------------------|----------------------|---------------------|-------------|---------|
| no acute urinary toxicity                                               | 38 (12.1%)           | 276 (87.9%)         | 314 (74.1%) |         |
| total                                                                   | yes: N = 59 (13.9%)  | no: N = 365 (86.1%) | 424         |         |
| acute lymph edema                                                       | 3 (21.4%)            | 11 (78.6%)          | 14 (3.3%)   | 0.011   |
| no acute lymph edema                                                    | 56 (13.7%)           | 354 (86.3%)         | 410 (96.7%) |         |
| total                                                                   | yes: N = 59 (13.9%)  | no: N = 365 (86.1%) | 424         |         |
| <b>Presence of children (yes vs. no) X<sup>2</sup></b>                  |                      |                     |             |         |
| acute fatigue                                                           | 144 (93.5%)          | 10 (6.5%)           | 154 (36.3%) | 0.006   |
| no acute fatigue                                                        | 223 (82.6%)          | 47 (17.4%)          | 270 (63.7%) |         |
| total                                                                   | yes: N = 367 (86.5%) | no: N = 57 (13.5%)  | 424         |         |
| <b>Weight loss before RT (yes vs. no) X<sup>2</sup></b>                 |                      |                     |             |         |
| acute nausea                                                            | 12 (11.8%)           | 90 (88.2%)          | 102 (24.1%) | 0.042   |
| no acute nausea                                                         | 23 (7.1%)            | 299 (92.9%)         | 322 (75.9%) |         |
| total                                                                   | yes: N = 35 (8.3%)   | no: N = 389 (91.7%) | 424         |         |
| acute gastrointestinal toxicity                                         | 16 (9.7%)            | 149 (90.3%)         | 165 (38.9%) | 0.043   |
| no acute gastrointestinal toxicity                                      | 19 (7.3%)            | 240 (92.7%)         | 259 (61.1%) |         |
| total                                                                   | yes: N = 35 (8.3%)   | no: N = 389 (91.7%) | 424         |         |
| <b>Inpatient treatment (yes vs. no) X<sup>2</sup></b>                   |                      |                     |             |         |
| acute fatigue                                                           | 101 (65.6%)          | 53 (34.4%)          | 154 (36.3%) | <0.001  |
| no acute fatigue                                                        | 36 (13.3%)           | 234 (86.7%)         | 270 (63.7%) |         |
| total                                                                   | yes: N = 137 (32.3%) | no: N = 287 (67.7%) | 424         |         |
| definitive concept                                                      | 70 (45.2%)           | 85 (54.8%)          | 155 (36.6%) | <0.001  |
| adjuvant concept                                                        | 67 (24.9%)           | 202 (75.1%)         | 269 (63.4%) |         |
| total                                                                   | yes: N = 137 (32.3%) | no: N = 287 (67.7%) | 424         |         |
| FIGO stage 1/2                                                          | 12 (4.8%)            | 236 (95.2%)         | 248 (58.5%) | 0.006   |
| FIGO stage 3/4                                                          | 125 (71.0%)          | 51 (29.0%)          | 176 (41.5%) |         |
| total                                                                   | yes: N = 137 (32.3%) | no: N = 287 (67.7%) | 424         |         |
| extended RT fields                                                      | 36 (76.6%)           | 11 (23.4%)          | 47 (11.1%)  | 0.012   |
| no extended RT fields                                                   | 101 (26.8%)          | 276 (73.2%)         | 377 (88.9%) |         |
| total                                                                   | yes: N = 137 (32.3%) | no: N = 287 (67.7%) | 424         |         |
| Charlson Comorbidity index* ≤ 5                                         | 86 (24.6%)           | 263 (75.4%)         | 349 (82.3%) | <0.001  |
| Charlson Comorbidity index* > 5                                         | 51 (68.0%)           | 24 (32.0%)          | 75 (17.7%)  |         |
| total                                                                   | yes: N = 137 (32.3%) | no: N = 287 (67.7%) | 424         |         |
| <b>Inpatient rehabilitation (yes. vs. no) X<sup>2</sup></b>             |                      |                     |             |         |
| acute urinary toxicity                                                  | 38 (34.5%)           | 72 (65.5%)          | 110 (25.9%) | 0.031   |
| no acute urinary toxicity                                               | 84 (26.8%)           | 230 (73.2%)         | 314 (74.1%) |         |
| total                                                                   | yes: N = 122 (28.8%) | no: N = 302 (71.2%) | 424         |         |
| High educational level                                                  | 48 (78.7%)           | 13 (21.3%)          | 61 (24.9%)  | 0.022   |
| Low educational level                                                   | 12 (6.5%)            | 172 (93.5%)         | 184 (75.1%) |         |
| total                                                                   | yes: N = 60 (28.8%)  | no: N = 185 (71.2%) | 245         |         |
| social in-house counselling                                             | 112 (46.5%)          | 129 (53.5%)         | 241 (56.8%) | <0.0001 |
| no social in-house counselling                                          | 10 (5.5%)            | 173 (94.5%)         | 183 (43.2%) |         |
| total                                                                   | yes: N = 122 (28.8%) | no: N = 302 (71.2%) | 424         |         |
| fatigue relief                                                          | 62 (66.0%)           | 32 (34.0%)          | 94 (22.2%)  | <0.001  |
| no fatigue relief                                                       | 60 (18.2%)           | 270 (81.8%)         | 330 (77.8%) |         |
| total                                                                   | yes: N = 122 (28.8%) | no: N = 302 (71.2%) | 424         |         |
| <b>In-house social service consultation (yes. vs. no) X<sup>2</sup></b> |                      |                     |             |         |
| acute nausea                                                            | 71 (69.6%)           | 31 (30.4%)          | 102 (24.1%) | 0.011   |
| no acute nausea                                                         | 170 (52.8%)          | 152 (47.2%)         | 322 (75.9%) |         |
| total                                                                   | yes: N = 241 (56.8%) | no: N = 183 (43.2%) | 424         |         |
| Charlson Comorbidity index * ≤ 5                                        | 193 (55.3%)          | 156 (44.7%)         | 349 (82.3%) | 0.039   |
| Charlson Comorbidity index * > 5                                        | 48 (64.0%)           | 27 (36.0%)          | 75 (17.7%)  |         |

|                                                  |                      |                     |             |        |
|--------------------------------------------------|----------------------|---------------------|-------------|--------|
| total                                            | yes: N = 241 (56.8%) | no: N = 183 (43.2%) | 424         |        |
| <b>Return to work (yes vs. no) X<sup>2</sup></b> |                      |                     |             |        |
| oncologic progression                            | 4 (11.1%)            | 32 (88.9%)          | 36 (18.8%)  | <0.001 |
| no oncologic progression                         | 97 (62.2%)           | 59 (37.8%)          | 156 (81.3%) |        |
| total                                            | yes: N = 101 (52.9%) | no: N = 91 (47.6%)  | 192         |        |
| FIGO stage 1/2                                   | 66 (62.9%)           | 39 (37.1%)          | 105 (54.7%) | 0.003  |
| FIGO stage 3/4                                   | 35 (40.2%)           | 52 (59.8%)          | 87 (45.3%)  |        |
| total                                            | yes: N = 101 (52.9%) | no: N = 91 (47.6%)  | 192         |        |
| inpatient cancer rehabilitation                  | 79 (64.8%)           | 43 (35.2%)          | 122 (63.5%) | <0.001 |
| no inpatient cancer rehabilitation               | 22 (31.4%)           | 48 (68.6%)          | 70 (36.5%)  |        |
| total                                            | yes: N = 101 (52.9%) | no: N = 91 (47.6%)  | 192         |        |
| acute fatigue                                    | 34 (44.7%)           | 42 (55.2%)          | 76 (39.6%)  | 0.048  |
| no acute fatigue                                 | 67 (57.8%)           | 49 (42.2%)          | 116 (60.4%) |        |
| total                                            | yes: N = 101 (52.9%) | no: N = 91 (47.6%)  | 192         |        |
| fatigue relief                                   | 54 (57.4%)           | 40 (42.6%)          | 94 (49.0%)  | <0.001 |
| no fatigue relief                                | 47 (48.0)            | 51 (52.0%)          | 98 (51.0%)  |        |
| total                                            | yes: N = 101 (52.9%) | no: N = 91 (47.6%)  | 192         |        |
| BMI within normal ranges                         | 84 (68.9%)           | 38 (31.1%)          | 122 (63.5%) | 0.014  |
| Abnormal BMI                                     | 17 (24.3%)           | 53 (75.7%)          | 70 (36.5%)  |        |
| total                                            | yes: N = 101 (52.9%) | no: N = 91 (47.6%)  | 192         |        |
| depression                                       | 9 (18.4%)            | 40 (81.6%)          | 49 (25.5%)  | 0.010  |
| no depression                                    | 92 (64.3%)           | 51 (35.7%)          | 143 (74.5%) |        |
| total                                            | yes: N = 101 (52.9%) | no: N = 91 (47.6%)  | 192         |        |
| definitive concept                               | 42 (40.0%)           | 63 (60.0%)          | 105 (54.7%) | 0.024  |
| adjuvant concept                                 | 59 (67.8%)           | 28 (32.2%)          | 87 (45.3%)  |        |
| total                                            | yes: N = 101 (52.9%) | no: N = 91 (47.6%)  | 192         |        |
| self-employment                                  | 9 (100%)             | 0 (0%)              | 9 (6.3%)    | 0.029  |
| salaried employment                              | 58 (43.6%)           | 75 (56.3%)          | 133 (93.7%) |        |
| total                                            | yes: N = 67 (47.2%)  | no: N = 75 (52.8%)  | 142         |        |

SD: standard deviation. RT: radiotherapy, X<sup>2</sup>: Pearson Chi-squared (X<sup>2</sup>) test. A *p*-value less than 0.05 was being considered statistically significant. \* the Charlson comorbidity index [15] was utilized with an adjusted scoring for the category of “solid tumor”: points were count-ed only if a second malignancy, other than the treated one, was present.

**Table S2.** Statistical results for Mann-Whitney U test.

| Characteristics                    | N   | Median | Mean | SD    | Q1–Q3 | Min–Max | <i>p</i> -Value |
|------------------------------------|-----|--------|------|-------|-------|---------|-----------------|
| Number of fractions <sup>M</sup>   | 102 | 29     | 28.4 | ±4.3  | 27–30 | 4–36    | <0.001          |
| acute nausea                       |     |        |      |       |       |         |                 |
| no acute nausea                    | 322 | 27     | 20.4 | ±12.1 | 4–29  | 1–38    |                 |
| acute gastrointestinal toxicity    | 165 | 29     | 28.3 | ±4.5  | 27–30 | 4–35    | <0.001          |
| no acute gastrointestinal toxicity | 259 | 27     | 18.5 | ±12.6 | 4–29  | 1–38    |                 |
| acute dermatitis/mucositis         | 77  | 29     | 27.9 | ±6.1  | 27–30 | 4–36    | <0.001          |
| no acute dermatitis/mucositis      | 347 | 27     | 21.0 | ±11.7 | 4–29  | 1–38    |                 |
| acute urinary toxicity             | 110 | 29     | 26.4 | ±7.9  | 27–30 | 1–36    | <0.001          |
| no acute urinary toxicity          | 314 | 27     | 20.8 | ±11.9 | 4–29  | 3–38    |                 |
| acute fatigue                      | 154 | 29     | 26.0 | ±8.3  | 27–30 | 4–36    | <0.001          |
| no acute fatigue                   | 270 | 27     | 20.1 | ±12.2 | 4–29  | 1–38    |                 |
| inpatient treatment                | 137 | 29     | 28.8 | ±3.5  | 28–30 | 4–38    | <0.001          |
| no inpatient treatment             | 287 | 4      | 15.5 | ±12.4 | 4–28  | 1–35    |                 |
| inpatient cancer rehabilitation    | 122 | 29     | 24.0 | ±10.2 | 25–30 | 3–35    | 0.032           |
| no inpatient cancer rehabilitation | 302 | 28     | 21.4 | ±11.7 | 4–29  | 1–38    |                 |
| RT doses <sup>M</sup>              |     |        |      |       |       |         |                 |

|                                    |     |      |      |       |           |           |        |
|------------------------------------|-----|------|------|-------|-----------|-----------|--------|
| acute nausea                       | 102 | 45   | 46.7 | ±4.5  | 45.0–50.4 | 22.0–54.4 | <0.001 |
| no acute nausea                    | 322 | 45   | 38.9 | ±12.8 | 22.0–50.4 | 5.5–60.0  |        |
| acute gastrointestinal toxicity    | 165 | 45   | 46.7 | ±4.9  | 45.0–50.4 | 22.0–60.0 | <0.001 |
| no acute gastrointestinal toxicity | 259 | 45   | 36.9 | ±13.3 | 22.0–50.4 | 5.5–60.0  |        |
| acute dermatitis/mucositis         | 77  | 50.4 | 47.9 | ±7.3  | 45.0–50.4 | 22.0–60.0 | <0.001 |
| no acute dermatitis/mucositis      | 347 | 45   | 39.1 | ±12.1 | 22.0–50.4 | 5.5–60.0  |        |
| acute urinary toxicity             | 110 | 45   | 44.9 | ±9.1  | 45.0–50.4 | 5.5–56.0  | <0.001 |
| no acute urinary toxicity          | 314 | 45   | 39.2 | ±12.4 | 22.0–50.4 | 15.0–60.0 |        |
| acute fatigue                      | 154 | 45   | 44.7 | ±9.0  | 45.0–50.4 | 22.0–60.0 | <0.001 |
| no acute fatigue                   | 270 | 45   | 38.5 | ±12.7 | 22.0–50.4 | 5.5–60.0  |        |
| inpatient treatment                | 137 | 45   | 46.9 | ±4.7  | 45.0–50.4 | 22.0–60.0 | <0.001 |
| no inpatient treatment             | 287 | 22   | 34.3 | ±13.6 | 22.0–50.4 | 5.5–56.0  |        |

<sup>M</sup>: Mann-Whitney U test, max: maximum, min: minimum, N: number of patients, Q1: first quartile, Q3: third quartile, SD: standard deviation. A *p*-value less than 0.05 was being considered statistically significant.
